# Supplementary material
Source: PubMed Central journal article supplement (PMC6800631)
Supplement: NIHMS1534734-supplement-1.pdf [file NIHMS1534734-supplement-1.pdf]

## Sequences of Optogenetic Constructs

### **OMM-PAC Related to Figure 1**

ATGGCCATCCAGCTGCGGAGCCCCTTCCCCCTGGCCCTGCCCGGCATGCTGGCCCTGCTGGGCTGGTGGTGGTTCT  
TCAGCCGGAAGAAGGGTACCGGTGGCAGTGGTGGCACCGTGAGCAAGGGCGAGGAGGATAACATGGCCATCAT  
CAAGGAGTTCATGCGTTCAAGGTGCACATGGAGGGCTCCGTGAACGGCCACGAGTTCGAGATCGAGGGCGAGG  
GCGAGGGCCGCCCTACGAGGGCACCCAGACCGCCAAGCTGAAGGTGACCAAGGGTGGCCCCCTGCCCTTCGCC  
TGGGACATCCTGTCCCCTCAGTTCATGTACGGCTCCAAGGCCTACGTGAAGCACCCCCGCCGACATCCCCGACTACT  
TGAAGCTGTCCTTCCCCGAGGGCTTCAAGTGGGAGCGCGTGATGAACTTCGAGGACGGCGGCGTGGTACCCTG  
ACCCAGGACTCCTCCCTGCAGGACGGCGAGTTCATCTACAAGGTGAAGCTGCGCGGCACCAACTTCCCCTCCGAC  
GGCCCCGTAATGCAGAAGAAGACCATGGGCTGGGAGGCCTCCTCCGAGCGGATGTACCCCGAGGACGGCGCCCT  
GAAGGGCGAGATCAAGCAGAGGCTGAAGCTGAAGGACGGCGGCCACTACGACGCTGAGGTCAAGACCACCTAC  
AAGGCCAAGAAGCCCGTGCAGCTGCCCGCGCCTACAACGTCAACATCAAGTTGGACATCACCTCCACAACGAG  
GACTACACCATCGTGGAACAGTACGAACGCGCCGAGGGCCGCACTCCACCGCGGCATGGACGAGCTGTACAA  
GACTAGTGGCGGAGGTGGCAGTGGTGGCGGAGGTAGTGGCAGTGGTGGCGGAGGTAGTGGCAGTGGTGGCGG  
AGGTAGTGGCGGAGGCGGTAGTATGATGAAACGACTGGTGTATATTAGCAAAATCTCAGGGCATCTGTCTCTGGA  
AGAAATTCAGCGGATCGGGAAAGTGTCAATCAAAAACAATCAGAGGGACAATATTACCGGAGTGTCTGTACCT  
GCAGGGCCTGTTCTTTCAGATCCTGGAGGGAGAAAACGAGAAGGTGGATAAACTGTACAAGAAAATCCTGGTGG  
ACGATCGCCACACAAAATATTCTGTGCCTGAAGACAGAATATGACATCACTGATCGAATGTTCCCAAATGGGCCAT  
GAAAATATCAACCTGAATGAAAATCTGAGCTGATGATCCAGCCATTAAGAGTCTGCTGCAGACCATCACACAG  
TCACATCGAGTGTGGAGAAATACATGCCTGCTCGGGTCACTATCTGATTAATCAGGGGATTAACCCCTGACAG  
TGGAACCTCAGCTGGTCGAGAAGATCATTTTCTTTTCAGACATCCTGGCCTTCAGCACTCTGACCGAAAACTGCCA  
GTGAATGAGGTGGTCATCCTGGTCAACAGGACTTTTTCCATTTGCACCCGCATCATTTCTGCTTATGGCGGGGAAG  
TGACAAAGTTCATTGGGGATTGCGTGATGGCCAGCTTCACCAAAGAGCAGGGAGACGCCGCTATCCGGACCAGCC  
TGGACATCATTAGTGAAGTGAAGCAGCTGAGGCACCATGTGGAGGCCACCAATCCCCTGCACCTGCTGTACACAG  
GAATCGGCCTGTCTATGGCCATGTGATTGAAGGGAATATGGGAAGCTCCCTGAAGATGGACCACACCCTGCTGG  
GGGATGCAGTGAACGTCGACGACGGCTGGAGGCCCTGACAAGACAGCTGCCTTACGCTCTGGCATTCACTGCCG  
GCGTGAAGAAATGCTGTCAGGCTCAGTGGACTTTTATTAATCTGGGCGCTCATCAGGTGAAGGGGAAAACAGGAA  
GCAATCGAGGTGTATACCGTCAACGAGGCCAGAAATACTACGATACCCTGCAGATTACTCAGCTGATTAGACAG  
ACCCTGGAAAACGACAAGGACTACAAAGACGACGATGACAAGTGAG

### **PM-PAC Related to Figure 1**

ATGGTGAGCAAGGGCGAGGAGGATAACATGGCCATCATCAAGGAGTTCATGCGCTTCAAGGTGCACATGGAGGG  
CTCCGTGAACGGCCACGAGTTCGAGATCGAGGGCGAGGGCGAGGGCCGCCCTACGAGGGCACCCAGACCGCCA  
AGCTGAAGGTGACCAAGGGTGGCCCCCTGCCCTTCGCTGGGACATCCTGTCCCCTCAGTTCATGTACGGCTCCAA  
GGCCTACGTGAAGCACCCCGCCGACATCCCCGACTACTTGAAGCTGTCTTCCCCGAGGGCTTCAAGTGGGAGCG  
CGTGATGAACTTCGAGGACGGCGGCGTGGTACCCTGACCCAGGACTCCTCCCTGCAGGACGGCGAGTTCATCTA  
CAAGGTGAAGCTGCGCGGCACCAACTTCCCCTCCGACGGCCCCGTAATGCAGAAGAAGACCATGGGCTGGGAGG  
CCTCCTCCGAGCGGATGTACCCCGAGGACGGCGCCTGAAGGGCGAGATCAAGCAGAGGCTGAAGCTGAAGGAC  
GGCGGCCACTACGACGCTGAGGTCAAGACCACCTACAAGGCCAAGAAGCCCGTGCAGCTGCCCGCGCCTACAA  
CGTCAACATCAAGTTGGACATCACCTCCACAACGAGGACTACACCATCGTGAACAGTACGAACGCGCCGAGGG  
CCGCCACTCCACCGCGGCATGGACGAGCTGTACAAGACTAGTGGCGGAGGTGGCAGTGGTGGCGGAGGTAGT  
GGCAGTGGTGGCGGAGGTAGTGGCAGTGGTGGCGGAGGTAGTGGCGGAGGCGGTAGTATGATGAAACGACTG  
GTGTATATTAGCAAAATCTCAGGGCATCTGTCTGGAAGAAATTCAGCGGATCGGGAAAGTGTCAATCAAAAAC  
AATCAGAGGGACAATATTACCGGAGTGTCTGTACCTGCAGGGCCTGTTCTTTCAGATCCTGGAGGGAGAAAAC  
GAGAAGGTGGATAAACTGTACAAGAAAATCCTGGTGGACGATCGCCACACAAAATATTCTGTGCCTGAAGACAGAA  
TATGACATCACTGATCGAATGTTCCCAAATGGGCCATGAAAATATCAACCTGAATGAAAATCTGAGCTGATGA  
TCCAGCCCATTAAGAGTCTGCTGCAGACCATCACACAGTCACATCGAGTGTGGAGAAATACATGCCTGCTCGGGT  
CATCTATCTGATTAATCAGGGGATTAACCCCTGACAGTGGAACTCAGCTGGTGCAGAAAGATCATTTTCTTTTCAG  
ACATCCTGGCCTTCAGCACTCTGACCGAAAACTGCCAGTGAATGAGGTGGTCAACAGGTACTTTTC  
CATTTGCACCCGCATCATTTCTGCTTATGGCGGGGAAGTGACAAAGTTCATTGGGGATTGCGTGATGGCCAGCTTC  
ACCAAAGAGCAGGGAGACGCCGCTATCCGGACCAGCCTGGACATCATTAGTGAAGTGAAGCAGCTGAGGCACCA  
TGTGGAGGCCACCAATCCCCTGCACCTGCTGTACACAGGAATCGGCCTGTCTATGGCCATGTGATTGAAGGGAA  
TATGGGAAGCTCCCTGAAGATGGACCACACCCTGCTGGGGGATGCAGTGAACGTCGACGACGGCTGGAGGCC

TGACAAGACAGCTGCCTTACGCTCTGGCATTCACTGCCGGCGTGAAGAAATGCTGTCAGGCTCAGTGGACTTTTAT  
TAATCTGGGCGCTCATCAGGTGAAGGGGAAACAGGAAGCAATCGAGGTGTATACCGTCAACGAGGCCAGAAAT  
ACTACGATACCCTGCAGATTACTCAGCTGATTAGACAGACCCTGGAAAACGACAAGGACTACAAAGACGACGACG  
ACAAGAGCGGCAAGAAGAAGAAGAAGAAGAGCAAGACCAAGTGCCTGATCATGTGA

**Nu-PAC Related to Figure 1**

ATGGTGAGCAAGGGCGAGGAGGATAACATGGCCATCATCAAGGAGTTCATGCGCTCAAGGTGCACATGGAGGG  
CTCCGTGAACGGCCACGAGTTCGAGATCGAGGGCGAGGGCGAGGGCCGCCCTACGAGGGCACCCAGACCGCCA  
AGCTGAAGGTGACCAAGGGTGGCCCCCTGCCCTTCGCTGGGACATCCTGTCCCCTCAGTTCATGTACGGCTCCAA  
GGCTACGTGAAGCACCCCGCCGACATCCCCGACTACTTGAAGCTGTCTTCCCCGAGGGCTTCAAGTGGGAGCG  
CGTGATGAACTTCGAGGACGGCGGCGTGGTACCCTGACCCAGGACTCCTCCTGCAGGACGGCGAGTTCATCTA  
CAAGGTGAAGCTGCGCGGCACCAACTTCCCCTCCGACGGCCCCGTAATGCAGAAGAAGACCATGGGCTGGGAGG  
CCTCCTCCGAGCGGATGTACCCGAGGACGGCGCCCTGAAGGGCGAGATCAAGCAGAGGCTGAAGCTGAAGGAC  
GGCGGCCACTACGACGCTGAGGTCAAGACCCTACAAGGCCAAGAAGCCCGTGCAGCTGCCCGGCGCCTACAA  
CGTCAACATCAAGTTGGACATCACCTCCACAACGAGGACTACACCATCGTGGAACAGTACGAACGCGCCGAGGG  
CCGCCACTCCACCGGCGGCATGGACGAGCTGTACAAGACTAGTGCCGGAGGTGGCAGTGGTGGCGGAGGTAGT  
GGCAGTGGTGGCGGNAGGTAGTGGCAGTGGTGGNCGGAGGTAGTGGCGGNNAGGCGGTAGTATGATGAAACG  
ACTGGTGTANTATTAGCAAAATCTCAGGGCATCTGTCTCTGGAAGAAATTNCAGCGGATCGGGAAAGTGTCAATC  
AAAAACAATCAGAGGGACAATATTACCGGAGTGTCTGTACCTGCAGGGCCTGTTCTTTCAGATCCTGGAGGGA  
GAAAACGAGAAGGTGGATAAACTGTACAAGAAAATCTGGTGGACGATCGCCACACAAATATTCTGTGCCTGAAG  
ACAGAATATGACATCACTGATCGAATGTCCCAAATGGGCCATGAAAATCAACCTGAATGAAAATCTGAGC  
TGATGATCCAGCCATTAAGAGTCTGCTGCAGACCATCACACAGTCACATCGAGTGTGGAGAAAATACATGCCTGC  
TCGGGTCACTATCTGATTAATCAGGGGATTAACCCCTGACAGTGGAACTCAGCTGGTCGAGAAGATCATTTTC  
TTTTCAGACATCCTGGCCTTCAGCACTCTGACCGAAAATGCCAGTGAATGAGGTGGTCATCCTGGTCAACAGGT  
ACTTTTCCATTTGCACCCGCATCATTTCTGCTTATGGCGGGGAAGTGACAAAAGTTCATTGGGGATTGCGTGATGGC  
CAGCTTCACCAAAGAGCAGGGAGACGCCGCTATCCGACCAGCCTGGACATCATTAGTGAAGTGAAGCAGCTGAG  
GCACCATGTGGAGGCCACCAATCCCCTGCACCTGCTGTACACAGGAATCGGCCTGTCTATGGCCATGTGATTGAA  
GGGAATATGGGAAGCTCCCTGAAGATGGACCACACCCTGCTGGGGGATGCAGTGAACGTGCGAGCACGGCTGGA  
GGCCTGACAAGACAGCTGCCTTACGCTCTGGCATTCACTGCCGGCGTGAAGAAATGCTGTCAGGCTCAGTGGAC  
TTTTATTAATCTGGGCGCTCATCAGGTGAAGGGGAAACAGGAAGCAATCGAGGTGTATACCGTCAACGAGGCCCA  
GAAATACTACGATACCCTGCAGATTACTCAGCTGATTAGACAGACCCTGGAAAACGACAAGGACTACAAAGACGA  
CGACGACAAGCCCAAGAAGAAGCGGAAGGTGGAGGACGCCTGA

**Nu-Reporter Related to Figure 2**

ATGTACCCATACGATGTTCCAGATTACGCTATGGTGAGCAAGGGCGAGGAGCTGTTACCCGGGGTGGTGGCCATC  
CTGGTCGAGCTGGACGGCGACGTAAACGGCCACAAGTTCAGCGTGTCCGGCGAGGGCGAGGGCGATGCCACCTA  
CGGCAAGCTGACCCTGAAGTTCATCTGCACCACCGCAAGCTGCCCGTGCCTGGCCACCCTCGTGACCACCCTG  
TCCTGGGGCGTGCAGTGCTTCGCCGCTACCCCGACCACATGAAGCAGCACGACTTCTTCAAGTCCGCCATGCCCCG  
AAGGCTACGTCCAGGAGCGCACCATCTTCTTCAAGGACGACGGCAACTACAAGACCCCGCGCCGAGGTGAAGTTCG  
AGGGCGACACCCTGGTGAACCGCATCGAGCTGAAGGGCATCGACTTCAAGGAGGACGGCAACATCCTGGGGCAC  
AAGCTGGAGTACAACATCAGCGACAACGTCTATATACCCGCCGACAAGCAGAAGAACGGCATCAAGGCCAAC  
TTCAAGATCCGCCACAACATCGAGGACGGCGGCGTGCAGCTCGCCGACCACTACCAGCAGAACACCCCATCGGC  
GACGGCCCCGTGCTGCTGCCCGACAACCACTACCTGAGCACCCAGTCCAAGCTGAGCAAAGACCCCAACGAGAAG  
CGCGATCAGATGGTCTGCTGGAGTTCGTGACCGCCGCGGGATCACTCTCGGCATGGACGAGCTGTACAAGAGC  
GAGCACATCGAGCGGCGGGTGAAGCAACGCCGGCGGCCCCCCCGCCCCAAAAAAGAAGAGAAAGGTAGATCCAA  
AAAAGAAGAGAAAGGTAGATCCAAAAAAGAAGAGAAAGGTATGA
